# Supplementary material for: BMP-2 and VEGF-A modRNAs in collagen scaffold synergistically drive bone repair through osteogenic and angiogenic pathways
Source: PubMed Central journal article supplement (PMC7815925; doi:10.1038/s42003-020-01606-9), 2021-01-19
Supplement: 42003_2020_1606_MOESM2_ESM.pdf [file 42003_2020_1606_MOESM2_ESM.pdf]

## **Description of Additional Supplementary Files**

**File Name:** Supplementary Data 1

**Description:** Source data file for main figures.
